# Supplementary material
Source: PubMed Central journal article supplement (PMC2981636)

# **MSMS spectrum of modified peptides from HSA**

# MSMS spectrum of molecular ion 1731.99

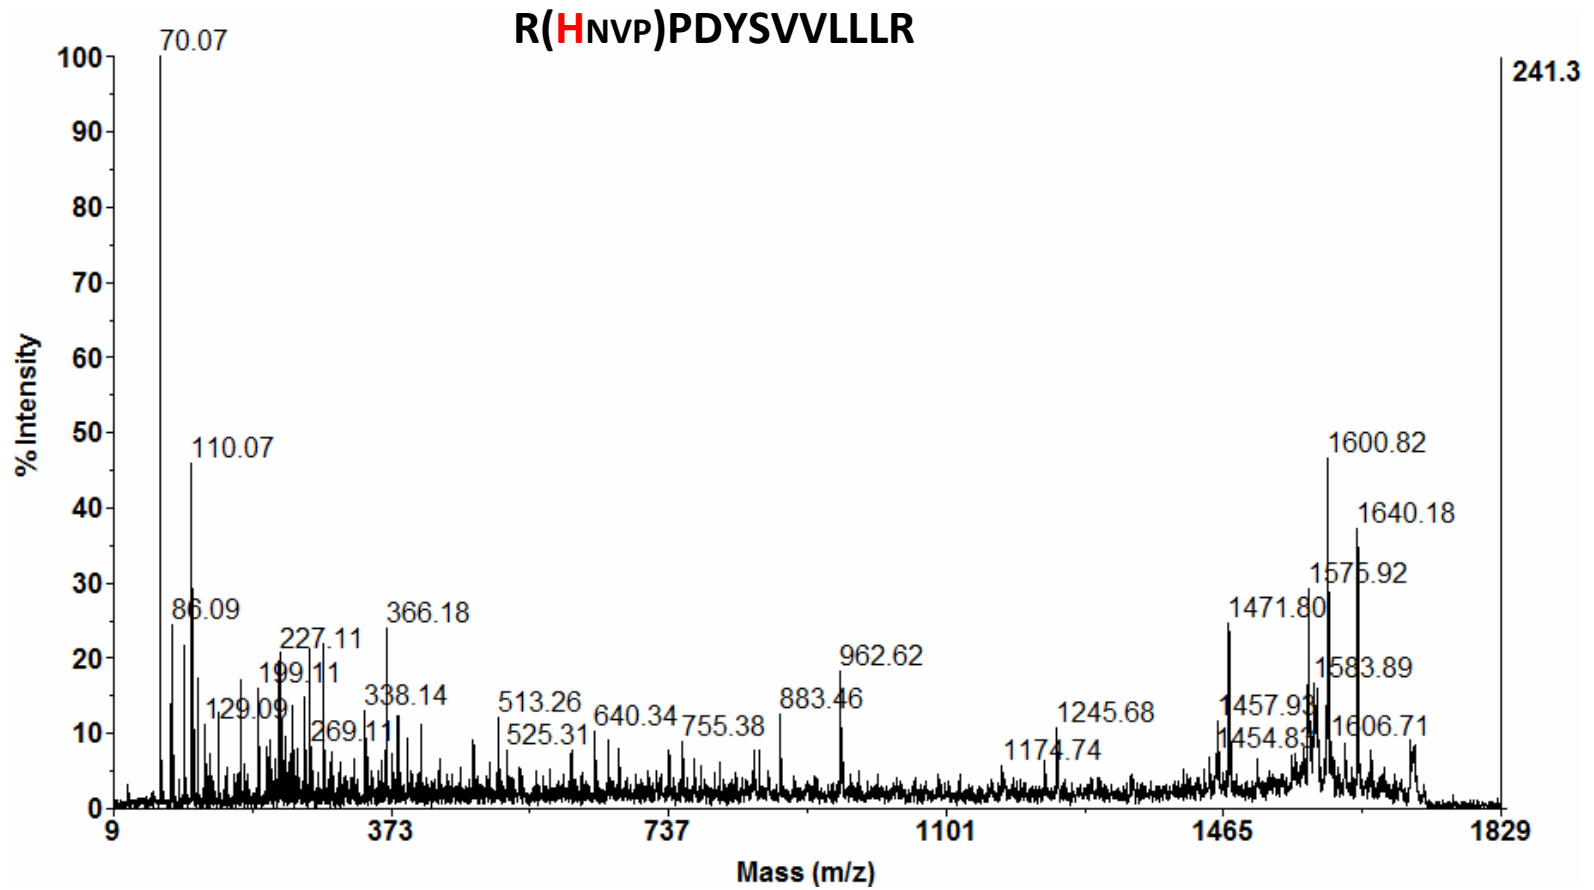

# MSMS spectrum of molecular ion 1782.98

LDELRDEG(K<sub>NVP</sub>)ASSAK

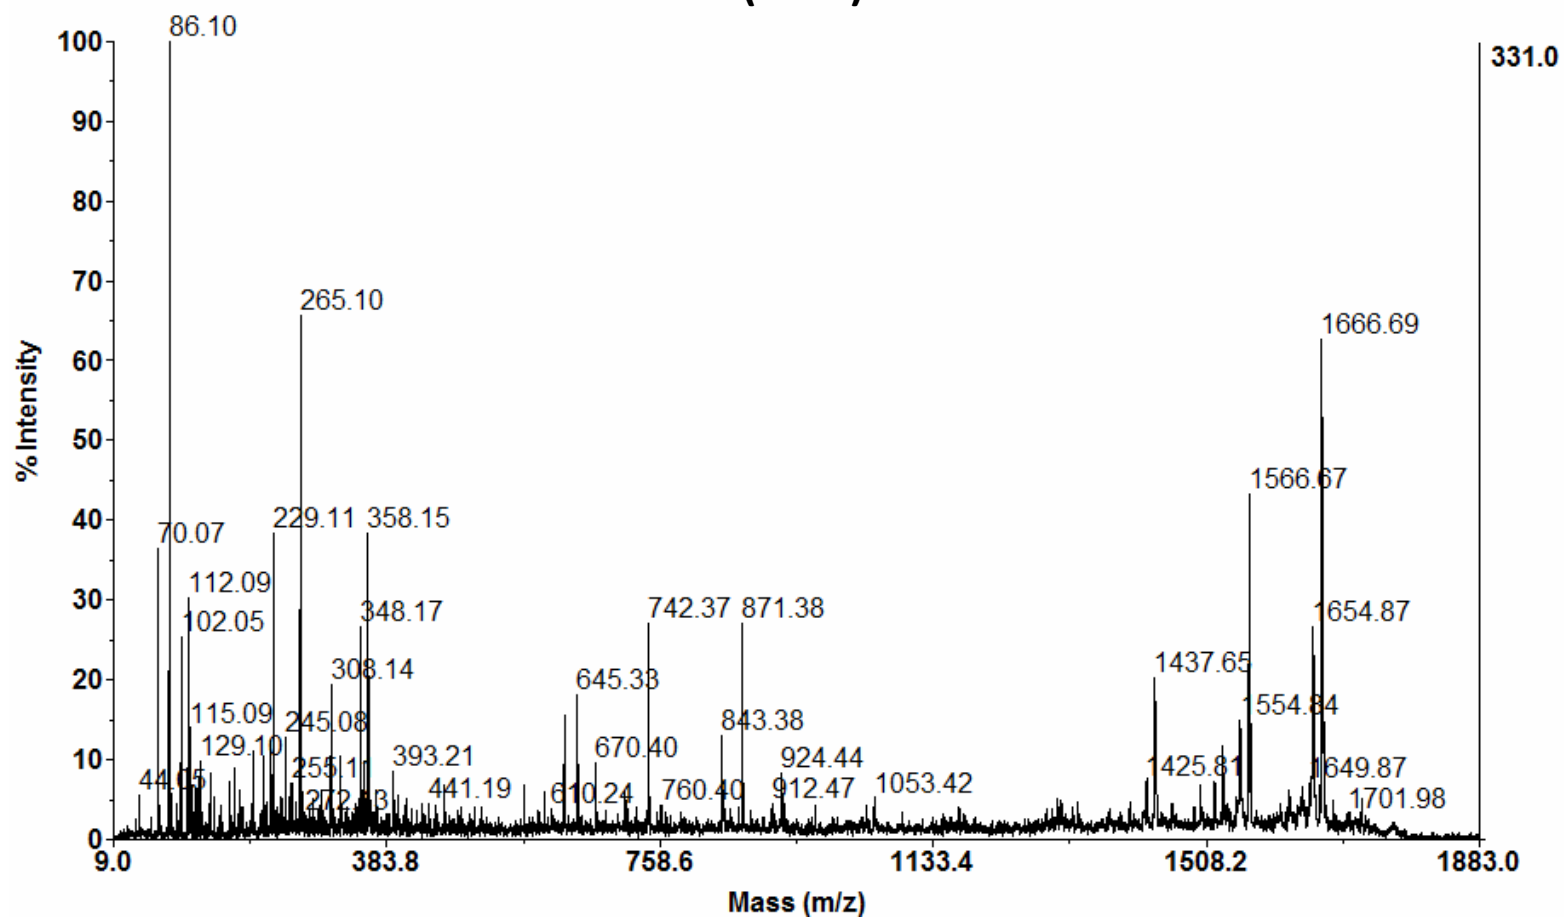

# MSMS spectrum of molecular ion 2047.12

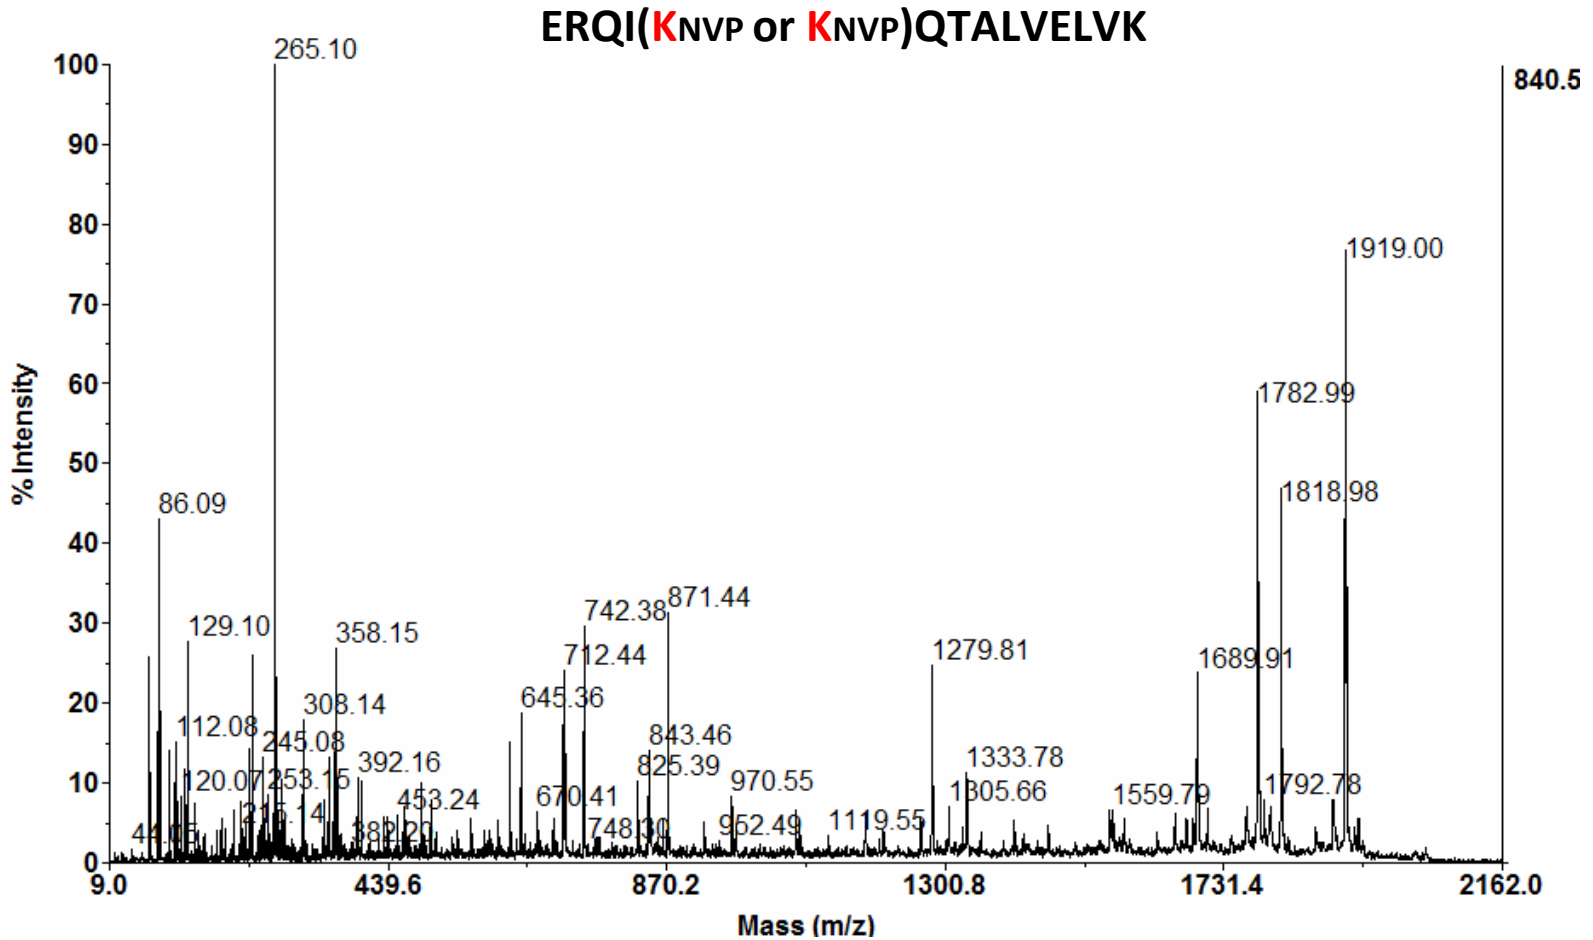

# **MSMS spectra of modified peptides from Hb**

# MSMS spectrum of molecular ion 1538.91

LLVVYP(W<sub>NVP</sub>)TQR

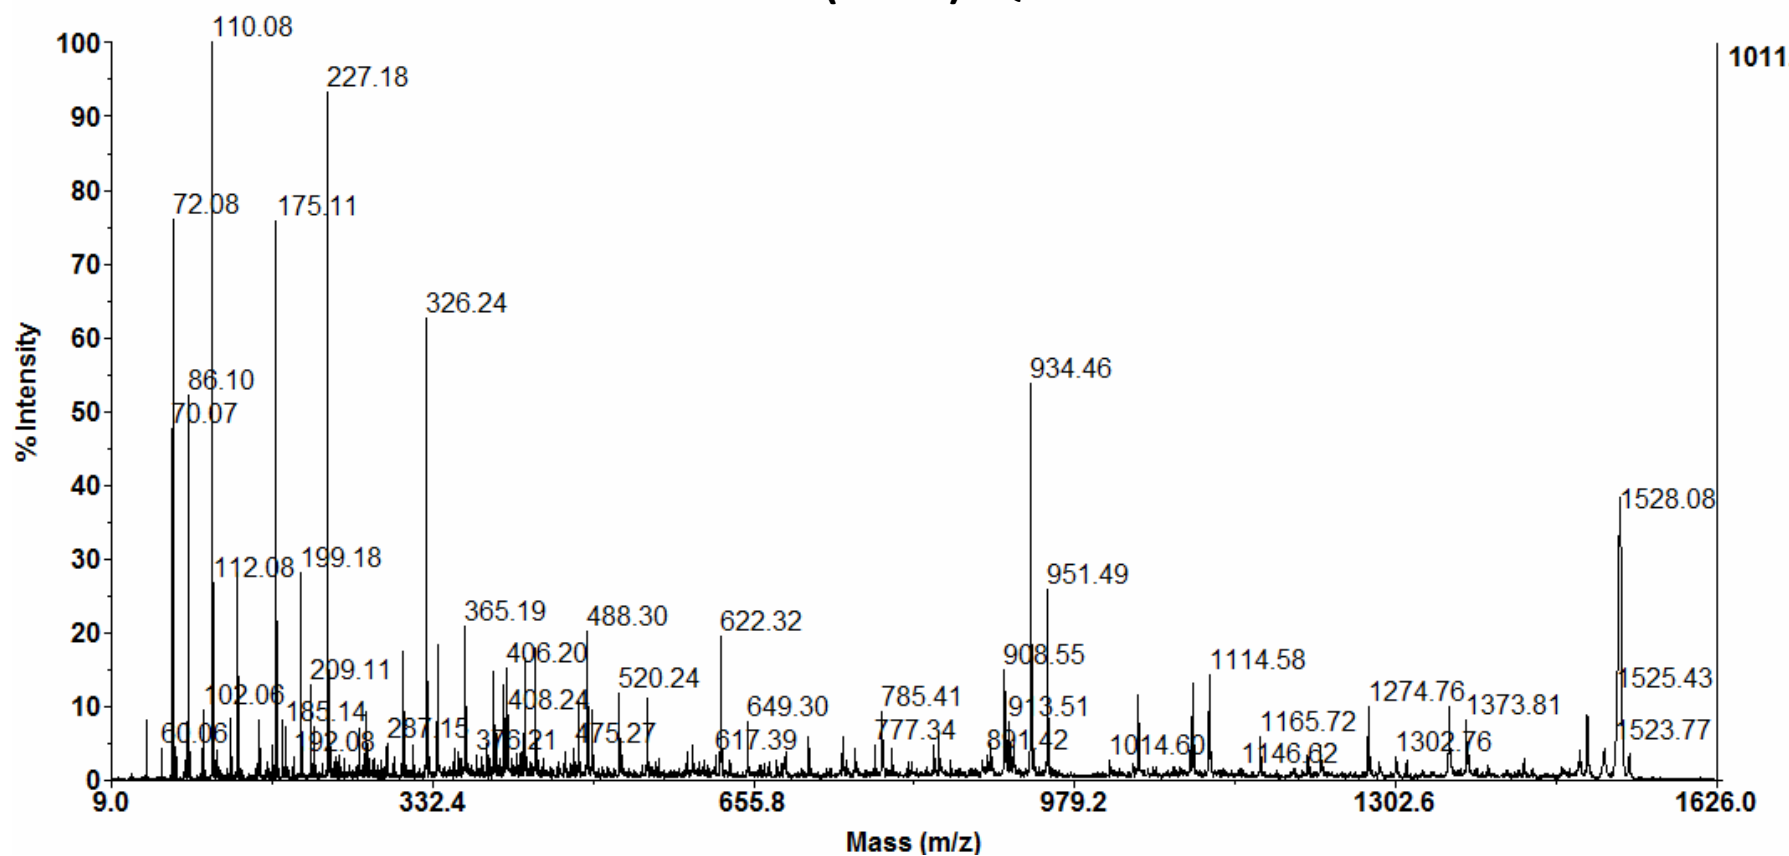

# MSMS spectrum of molecular ion 1793.93

VGA(H<sub>NVP</sub>)AGEYGAEALER

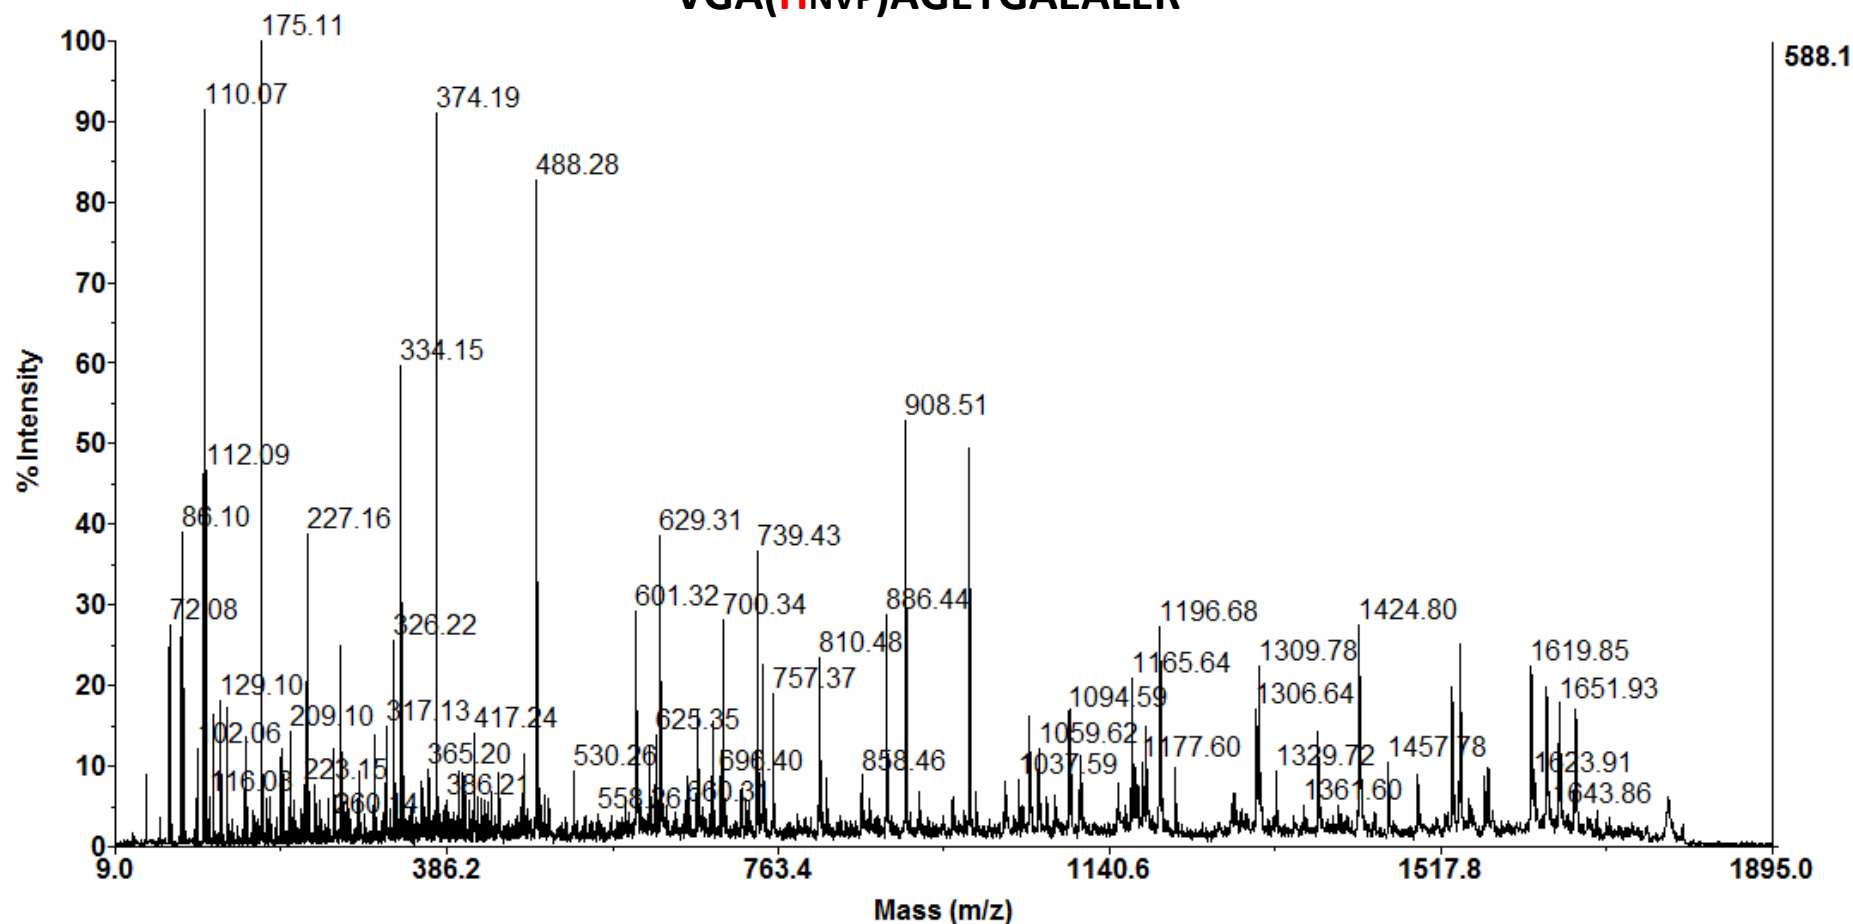

# MSMS spectrum of molecular ion 2793.43

GTFATL(S<sub>NVP</sub>)ELHCDKLHVDPENFR

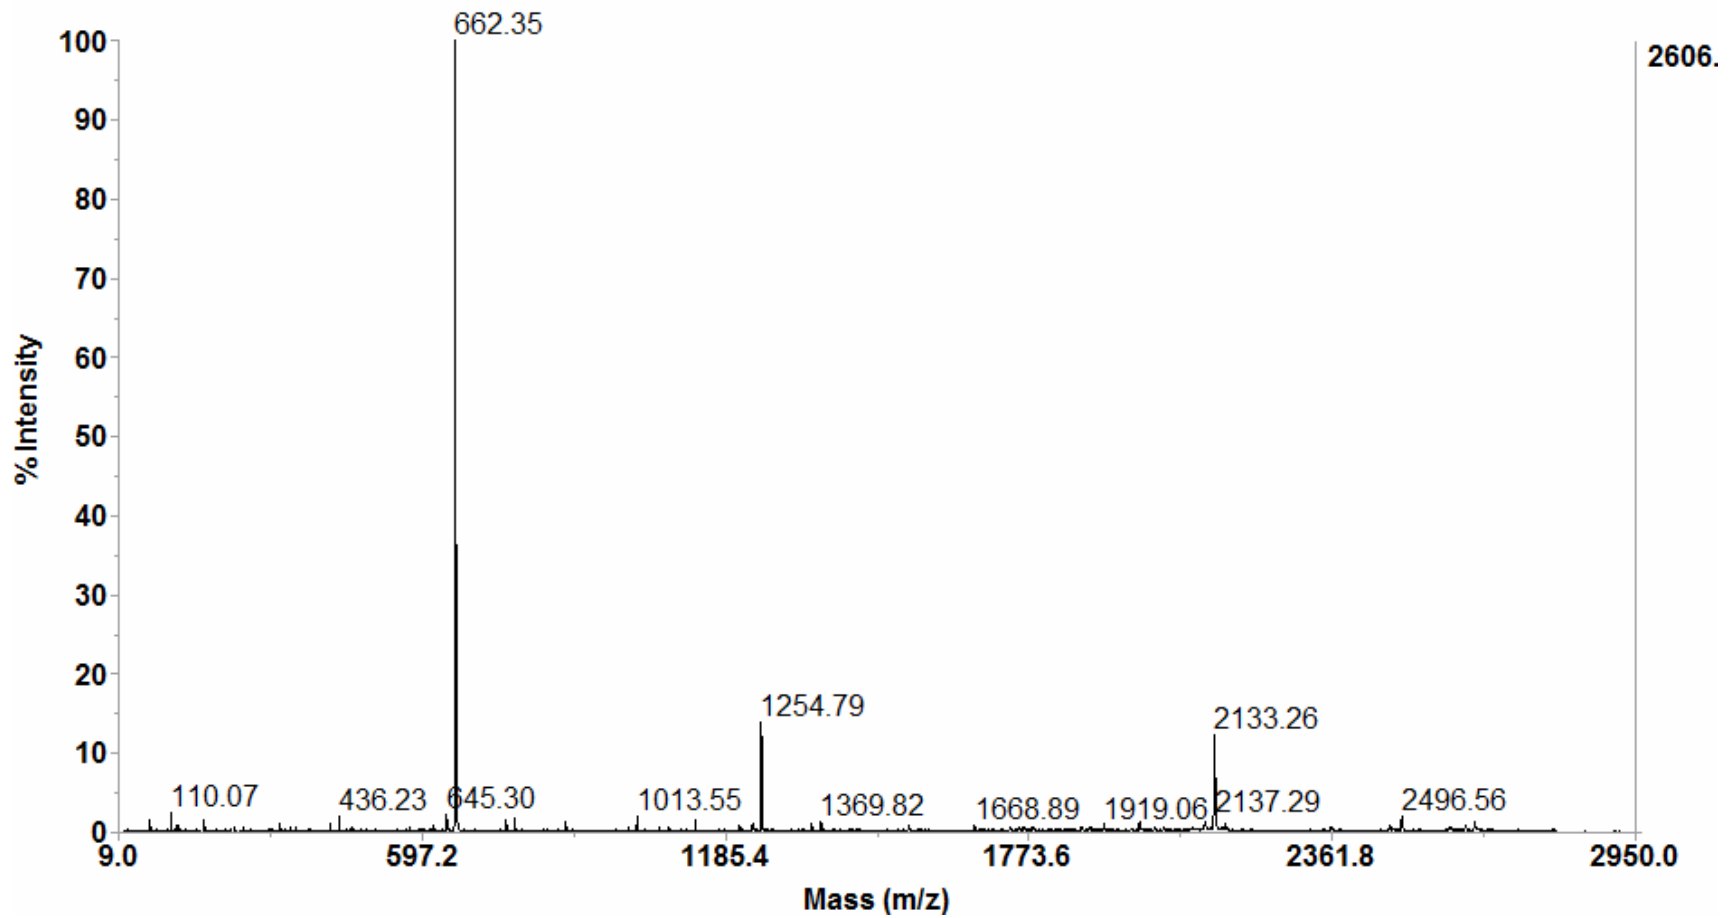

Supplement: NIHMS233595-supplement-1_si_001.pdf [file NIHMS233595-supplement-1_si_001.pdf]
